# Supplementary material for: Laboratory Evaluation and Field Testing of Dengue NS1 and IgM/IgG Rapid Diagnostic Tests in an Epidemic Context in Senegal
Source: MDPI journal article supplement (doi:10.3390/v15040904), 2023-03-31
Supplement: s1 [file s1]

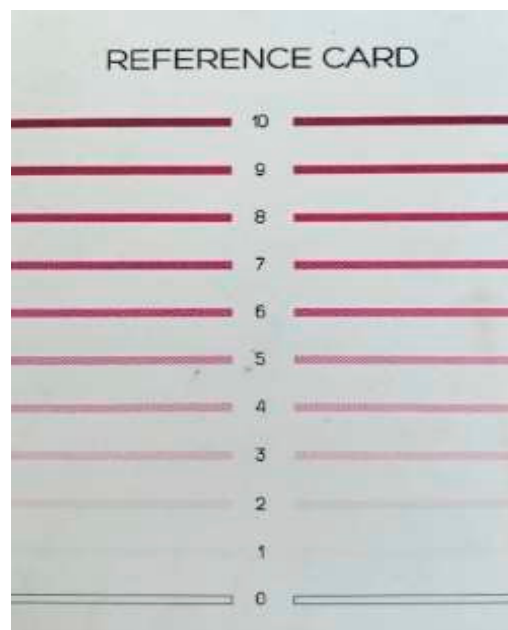

Figure S1. Gold colour intensity card used for the evaluation

Table S1. Dengue NS1 RDT Results

| Panel Tested      | Condition tested               | reference test   | analysed test  | analysis values | Sensitivity (%) | Specificity (%) | n   | analysed method | reference method |     |
|-------------------|--------------------------------|------------------|----------------|-----------------|-----------------|-----------------|-----|-----------------|------------------|-----|
|                   |                                |                  |                |                 |                 |                 |     |                 | pos              | Neg |
| Sensitivity Panel | All Dengue NS1 Panel           | Biorad-NS1 ELISA | Dengue NS1 RDT | estimate:       | 88              | 100             | 176 | pos             | 42               | 0   |
|                   |                                |                  |                | 95%CI:          | [75-95]         | [97-100]        |     |                 |                  |     |
|                   |                                |                  |                | p-value         | 1.01e-07        | 5.88e-39        |     | neg             | 6                | 128 |
|                   | Dengue 1 Serotype              | Biorad-NS1 ELISA | Dengue NS1 RDT | estimate:       | 79              |                 | 166 | pos             | 30               | 0   |
|                   |                                |                  |                | 95%CI:          | [63-90]         |                 |     |                 |                  |     |
|                   |                                |                  |                | p-value         | 4.72e-04        |                 |     | neg             | 8                | 128 |
|                   | Dengue 2 Serotype              | Biorad-NS1 ELISA | Dengue NS1 RDT | estimate:       | 100             |                 | 135 | pos             | 7                | 0   |
|                   |                                |                  |                | 95%CI:          | [59-100]        |                 |     |                 |                  |     |
|                   |                                |                  |                | p-value         | 1.56e-02        |                 |     | neg             | 0                | 128 |
|                   | Dengue 3 Serotype              | Biorad-NS1 ELISA | Dengue NS1 RDT | estimate:       | 100             |                 | 131 | pos             | 3                | 0   |
|                   |                                |                  |                | 95%CI:          | [29-100]        |                 |     |                 |                  |     |
|                   |                                |                  |                | p-value         | 2.5e-01         |                 |     | neg             | 0                | 128 |
| Specificity Panel | YFV spiked samples             | Biorad-NS1 ELISA | Dengue NS1 RDT | estimate:       |                 | 100             | 73  | pos             | 42               | 0   |
|                   |                                |                  |                | 95%CI:          |                 | [86-100]        |     |                 |                  |     |
|                   |                                |                  |                | p-value         |                 | 5.96e-08        |     | neg             | 6                | 25  |
|                   | ZIKV spiked samples            | Biorad-NS1 ELISA | Dengue NS1 RDT | estimate:       |                 | 100             | 68  | pos             | 42               | 0   |
|                   |                                |                  |                | 95%CI:          |                 | [83-100]        |     |                 |                  |     |
|                   |                                |                  |                | p-value         |                 | 1.91e-06        |     | neg             | 6                | 20  |
|                   | WNV spiked samples             | Biorad-NS1 ELISA | Dengue NS1 RDT | estimate:       |                 | 100             | 67  | pos             | 42               | 0   |
|                   |                                |                  |                | 95%CI:          |                 | [82-100]        |     |                 |                  |     |
|                   |                                |                  |                | p-value         |                 | 3.81e-06        |     | neg             | 6                | 19  |
|                   | CHIKV spiked samples           | Biorad-NS1 ELISA | Dengue NS1 RDT | estimate:       |                 | 100             | 68  | pos             | 42               | 0   |
|                   |                                |                  |                | 95%CI:          |                 | [83-100]        |     |                 |                  |     |
|                   |                                |                  |                | p-value         |                 | 1.91e-06        |     | neg             | 6                | 20  |
|                   | P. falciparum positive samples | Biorad-NS1 ELISA | Dengue NS1 RDT | estimate:       |                 | 100             | 82  | pos             | 42               | 0   |
|                   |                                |                  |                | 95%CI:          |                 | [90-100]        |     |                 |                  |     |
|                   |                                |                  |                | p-value         |                 | 1.16e-10        |     | neg             | 6                | 34  |
|                   | NEG all *                      | RT-PCR           | Dengue NS1 RDT | estimate:       |                 | 100             | 58  | pos             | 42               | 0   |
|                   |                                |                  |                | 95%CI:          |                 | [69-100]        |     |                 |                  |     |
|                   |                                |                  |                | p-value         |                 | 1.95e-03        |     | neg             | 6                | 10  |

Table S2. Dengue IgM/IgG RDT IgM test line results

| Panel Tested                    | sample type           | reference test | analysed test | analysis values | Sensitivity (%) | Specificity (%) | n   | analysed method | reference method |     |
|---------------------------------|-----------------------|----------------|---------------|-----------------|-----------------|-----------------|-----|-----------------|------------------|-----|
|                                 |                       |                |               |                 |                 |                 |     |                 | pos              | neg |
| <b><u>Sensitivity Panel</u></b> | All Dengue IgM Panel  | MAC            | Dengue IgM    | estimate:       | 94              | 91              | 187 | pos             | 47               | 13  |
|                                 |                       | ELISA          | test line     | 95%CI:          | [83-99]         | [84-95]         |     |                 |                  |     |
|                                 |                       | &PRNT          |               | p-value         | 3.71e-11        | 6.84e-24        |     | neg             | 3                | 124 |
|                                 | Dengue IgM High POS   | MAC            | Dengue IgM    | estimate:       | 100             |                 | 157 | pos             | 20               | 13  |
|                                 |                       | ELISA          | test line     | 95%CI:          | [83-100]        |                 |     |                 |                  |     |
|                                 |                       | &PRNT          |               | p-value         | 1.91e-06        |                 |     | neg             | 0                | 124 |
|                                 | Dengue IgM Medium POS | MAC            | Dengue IgM    | estimate:       | 95              |                 | 159 | pos             | 21               | 13  |
|                                 |                       | ELISA          | test line     | 95%CI:          | [77-100]        |                 |     |                 |                  |     |
|                                 |                       | &PRNT          |               | p-value         | 1.1e-05         |                 |     | neg             | 1                | 124 |
|                                 | Dengue IgM Low POS    | MAC            | Dengue IgM    | estimate:       | 75              |                 | 145 | pos             | 6                | 13  |
|                                 |                       | ELISA          | test line     | 95%CI:          | [35-97]         |                 |     |                 |                  |     |
|                                 |                       | &PRNT          |               | p-value         | 2.89e-01        |                 |     | neg             | 2                | 124 |
| <b><u>Specificity Panel</u></b> | IgM Yellow Fever      | MAC            | Dengue IgM    | estimate:       |                 | 90              | 91  | pos             | 47               | 4   |
|                                 |                       | ELISA          | test line     | 95%CI:          |                 | [77-97]         |     |                 |                  |     |
|                                 |                       | &PRNT          |               | p-value         |                 | 1.03e-07        |     | neg             | 3                | 37  |
|                                 | IgM ZIKA              | MAC            | Dengue IgM    | estimate:       |                 | 65              | 70  | pos             | 47               | 7   |
|                                 |                       | ELISA          | test line     | 95%CI:          |                 | [41-85]         |     |                 |                  |     |
|                                 |                       | &PRNT          |               | p-value         |                 | 2.63e-01        |     | neg             | 3                | 13  |
|                                 | Malaria positive      | MAC            | Dengue IgM    | estimate:       |                 | 100             | 70  | pos             | 47               | 0   |
|                                 |                       | ELISA          | test line     | 95%CI:          |                 | [83-100]        |     |                 |                  |     |
|                                 |                       | &PRNT          |               | p-value         |                 | 1.91e-06        |     | neg             | 3                | 20  |
|                                 | Rheumatoid Factor+    | MAC            | Dengue IgM    | estimate:       |                 | 100             | 56  | pos             | 47               | 0   |
|                                 |                       | ELISA          | test line     | 95%CI:          |                 | [54-100]        |     |                 |                  |     |
|                                 |                       | &PRNT          |               | p-value         |                 | 3.13e-02        |     | neg             | 3                | 6   |
|                                 | NEG to all *          | MAC            | Dengue IgM    | estimate:       |                 | 92              | 100 | pos             | 47               | 4   |
|                                 |                       | ELISA          | test line     | 95%CI:          |                 | [81-98]         |     |                 |                  |     |
|                                 |                       | &PRNT          |               | p-value         |                 | 4.46e-10        |     | neg             | 3                | 46  |

Table S3. Laboratory evaluation of the Dengue IgM/IgG RDT IgG test line results.

| Panel Tested             | Condition tested     | reference test  | analysed test        | analysis values | Sensitivity (%) | Specificity (%) | n   | analysed method | reference method |     |
|--------------------------|----------------------|-----------------|----------------------|-----------------|-----------------|-----------------|-----|-----------------|------------------|-----|
|                          |                      |                 |                      |                 |                 |                 |     |                 | pos              | neg |
| <u>Sensitivity Panel</u> | All Dengue IgG Panel | IgG ELISA &PRNT | Dengue IgG Test Line | estimate:       | 70              | 91              | 121 | pos             | 62               | 3   |
|                          |                      |                 |                      | 95%CI:          | [59-79]         | [79-88]         |     |                 |                  |     |
|                          |                      |                 |                      | p-value         | <0.0001         | <0.0001         |     | neg             | 27               | 29  |
| <u>Specificity Panel</u> | IgG Yellow Fever     | IgG ELISA &PRNT | Dengue IgG Test Line | estimate:       |                 | 90              | 99  | pos             | 62               | 1   |
|                          |                      |                 |                      | 95%CI:          |                 | [55-99]         |     |                 |                  |     |
|                          |                      |                 |                      | p-value         |                 | 0.0004          |     | neg             | 27               | 9   |
|                          | IgG ZIKA             | IgG ELISA &PRNT | Dengue IgG Test Line | estimate:       |                 | 100             | 99  | pos             | 62               | 0   |
|                          |                      |                 |                      | 95%CI:          |                 | [69-100]        |     |                 |                  |     |
|                          |                      |                 |                      | p-value         |                 | <0.0001         |     | neg             | 27               | 10  |
|                          | Malaria positive     | IgG ELISA &PRNT | Dengue IgG Test Line | estimate:       |                 | 83              | 95  | pos             | 62               | 1   |
|                          |                      |                 |                      | 95%CI:          |                 | [35-99]         |     |                 |                  |     |
|                          |                      |                 |                      | p-value         |                 | 0.0156          |     | neg             | 27               | 5   |
|                          | Rheumatoid Factor+   | IgG ELISA &PRNT | Dengue IgG Test Line | estimate:       |                 | 67              | 95  | pos             | 62               | 2   |
|                          |                      |                 |                      | 95%CI:          |                 | [22-95]         |     |                 |                  |     |
|                          |                      |                 |                      | p-value         |                 | 0.0863          |     | neg             | 27               | 4   |
|                          | NEG all**            | IgG ELISA &PRNT | Dengue IgG Test Line | estimate:       |                 | 1               | 100 | pos             | 47               | 0   |
|                          |                      |                 |                      | 95%CI:          |                 | [93-100]        |     |                 |                  |     |
|                          |                      |                 |                      | p-value         |                 | <0.0001         |     | neg             | 3                | 50  |

Table S4. Field Evaluation results of the Dengue RDTs

| reference test   | analysed test        | analysis values | Sensitivity (%) | Specificity (%) | PPV (%)  | NPV (%)  | n  | analysed method | reference method |     |
|------------------|----------------------|-----------------|-----------------|-----------------|----------|----------|----|-----------------|------------------|-----|
|                  |                      |                 |                 |                 |          |          |    |                 | pos              | neg |
| MAC-ELISA & PRNT | Dengue IgM Test Line | estimate:       | 86              | 85              | 33       | 99       | 85 | pos             | 42               | 14  |
|                  |                      | 95%CI:          | [42-100]        | [76-92]         | [13-59]  | [92-100] |    |                 |                  |     |
|                  |                      | p-value         | 1.25e-01        | 7.03e-11        | 2.38e-01 | 1.2e-19  |    | neg             | 12               | 17  |
| IgG ELISA & PRNT | Dengue IgG Test Line | estimate:       | 78              | 55              | 75       | 59       | 88 | pos             | 6                | 12  |
|                  |                      | 95%CI:          | [64-88]         | [36-73]         | [62-86]  | [39-76]  |    |                 |                  |     |
|                  |                      | p-value         | 5.21e-05        | 7.2e-01         | 2.34e-04 | 4.58e-01 |    | neg             | 1                | 69  |
| Dengue RT-PCR    | Dengue NS1 RDT       | estimate:       | 82              | 75              | 75       | 82       | 46 | pos             | 18               | 6   |
|                  |                      | 95%CI:          | [60-95]         | [53-90]         | [53-9]   | [6-95]   |    |                 |                  |     |
|                  |                      | p-value         | 4.34e-03        | 2.27e-02        | 2.27e-02 | 4.34e-03 |    | neg             | 4                | 18  |

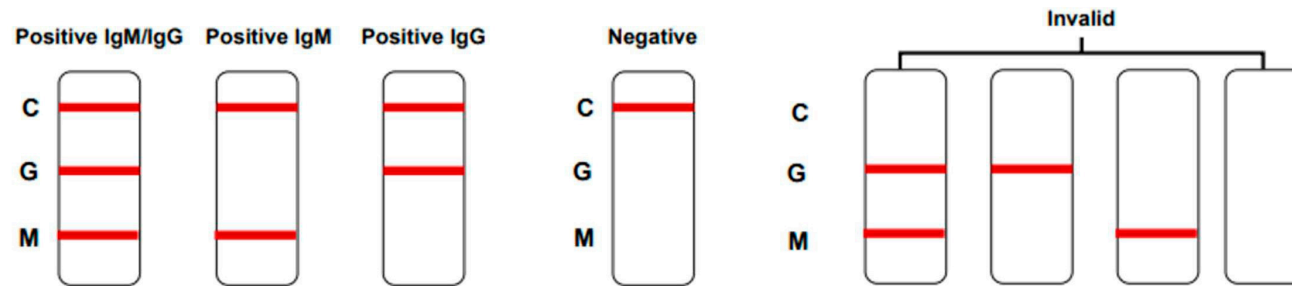

Figure S1. Illustration of different serology testing results using the Dengue IgM/IgG RDT.

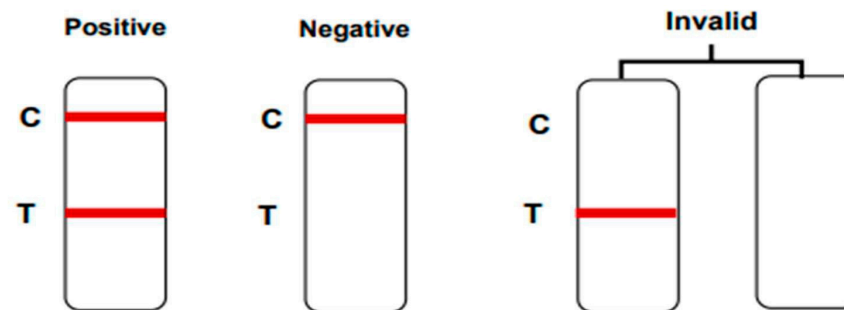

Figure S3. Illustration of different test results using the Dengue NS1 RDT
